# Supplementary material for: A non-endoscopic device to sample the oesophageal microbiota: a case-control study
Source: PubMed Central journal article supplement (PMC5656094; doi:10.1016/s2468-1253(16)30086-3), 2016-11-12
Supplement: mmc1.pdf [file mmc1.pdf]

# THE LANCET

## Gastroenterology & Hepatology

### Supplementary appendix

This appendix formed part of the original submission and has been peer reviewed.  
We post it as supplied by the authors.

Supplement to: Elliott DRF, Walker AW, O'Donovan M, Parkhill J, Fitzgerald RC.  
A non-endoscopic device to sample the oesophageal microbiota: a case-control study.  
*Lancet Gastroenterol Hepatol* 2016; published online Nov 11. [http://dx.doi.org/10.1016/S2468-1253\(16\)30086-3](http://dx.doi.org/10.1016/S2468-1253(16)30086-3).

## Web Appendix

### Supplementary Text

Patients who underwent oesophagectomy received perioperative cefazoline, a cephalosporin antibiotic that is bactericidal and interferes with cell wall synthesis. Although the bacteria undergo cell lysis, which could lead to loss of nuclear material, the oesophageal tissue samples were taken immediately after the oesophagus was surgically resected and snap frozen in liquid nitrogen. We expect that this short time interval should minimise the opportunity for DNA to be washed away (notably the patient does not swallow saliva while they are paralysed for the procedure). In support of this, there were no significant differences in alpha diversity measures between tumour samples that underwent surgery and received preoperative antibiotics compared to tumour samples collected by endoscopic biopsy. Furthermore, after excluding the six OAC patients who took antibiotics from our diversity analysis, the trend was the same and showed decrease diversity in cancer samples compared to controls, as evidenced by the observed OTU richness ( $p=0.0334$ ), the Chao estimate of total OTU richness ( $p=0.0076$ ), but not the Shannon diversity index ( $p=0.0821$ ).

### Supplementary Figures and Tables

□

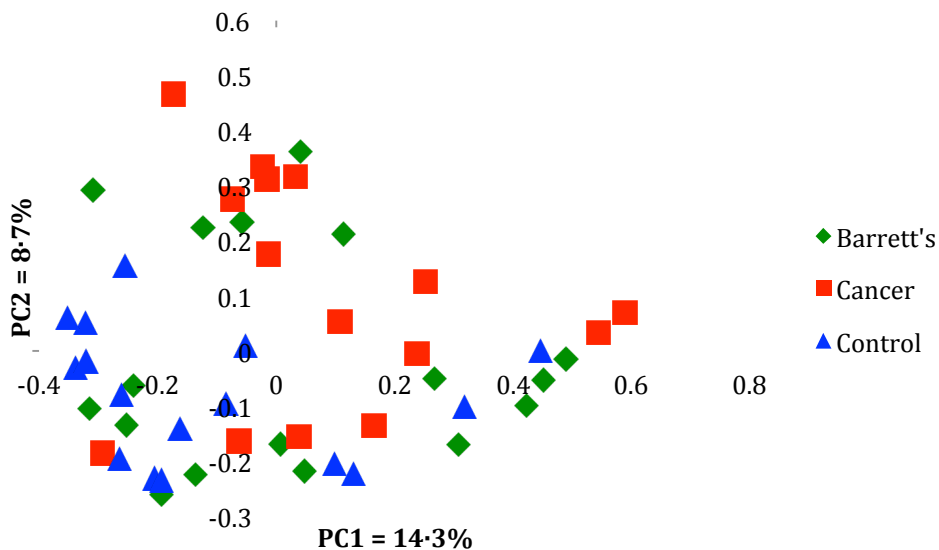

**Figure S1.** Principal coordinate analysis using the Bray-Curtis algorithm. The PCoA plot shows a significant separation between OAC and control samples ( $p=0.001$ ). The first axis (PC1) accounts for 14.3% of the sample variance and the second axis (PC2) accounts for 8.7% of the variance.

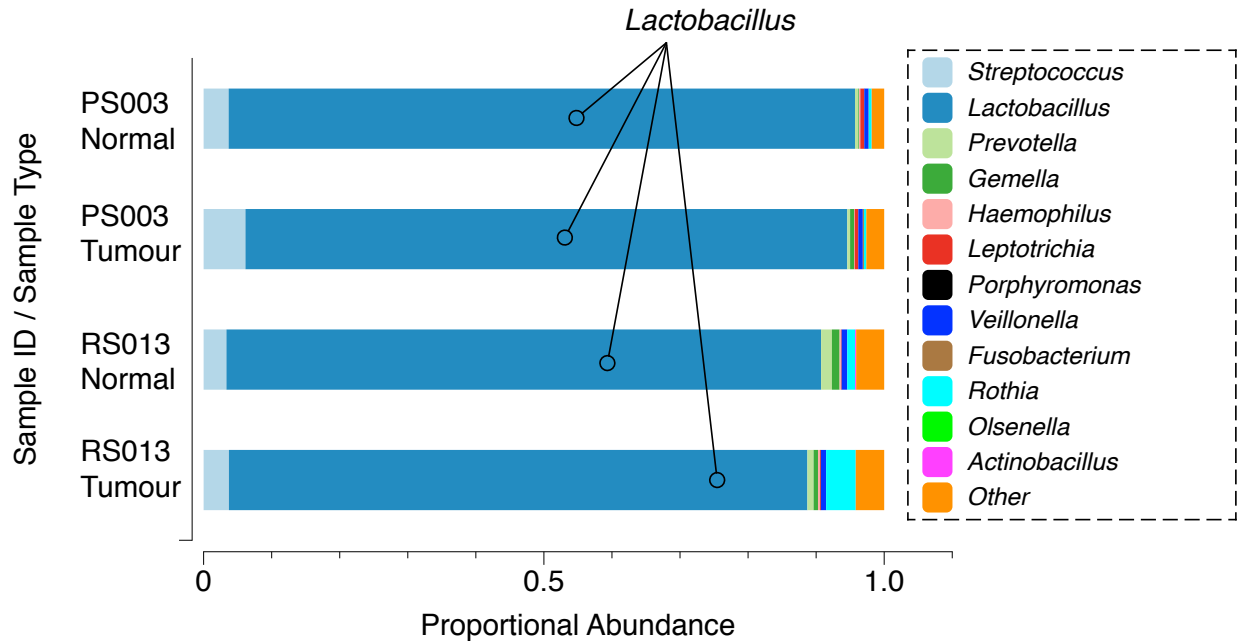

**Figure S2.** *Lactobacillus* is the dominant taxon in two tumour samples (PS003 and RS013) and matched normal squamous tissue.

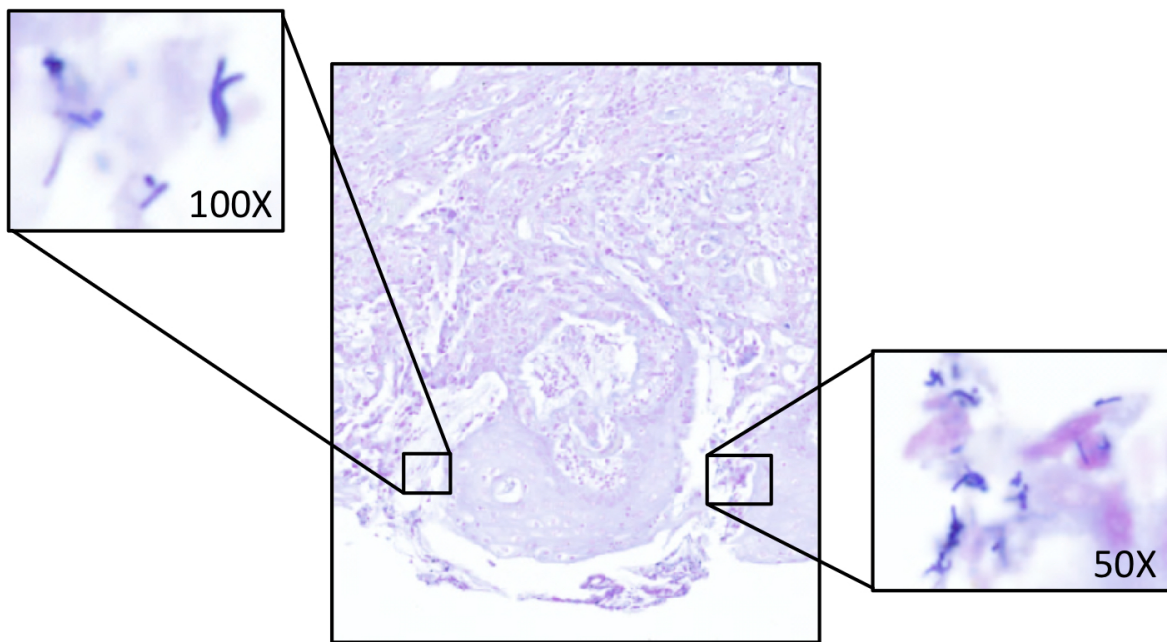

**Figure S3.** Tumour sample PS003 stained with haematoxylin and eosin, scanned at 20X magnification, imaged at 5% digital zoom. Inserts show Gram stain with Gram-positive rods, imaged at 50% or 100% digital zoom.

**Table S1. Clinicopathologic data for patients with oesophageal adenocarcinoma.** Patient CTX or RCTX refers to chemotherapy or radio-chemotherapy received at any time during the patient's treatment course. All samples were untreated with chemotherapy (naïve). R1=margin involved, R0=margin clear, RX=information not available.

| ID     | Patient CTX | Patient Survival (mos) | Sample type | Tumour type | Stage | Pathological TNM | Differentiation |
|--------|-------------|------------------------|-------------|-------------|-------|------------------|-----------------|
| PS/002 | Naïve       | Alive (70.8)           | Surgery     | GOJ Type 2  | 4     | T3N2M1           | Moderate        |
| PS/003 | Naïve       | Dead (22.8)            | Surgery     | GOJ Type 1  | 3     | T3N1M0           | Poor            |
| AH/085 | CTX         | Alive (43.6)           | Biopsy      | GOJ Type 2  | 2     | T3N0M0           | Moderate        |
| ST/041 | CTX         | Dead (18.6)            | Biopsy      | GOJ Type 2  | 3     | T4aN2M0          | Poor            |
| ST/030 | CTX         | Alive (38.3)           | Surgery     | GOJ Type 2  | 3     | T4aN0M0          | Moderate        |
| RS/007 | CTX         | Dead (10.1)            | Biopsy      | GOJ Type 1  | 4     | T3N3M1           | Poor            |
| RS/006 | CTX         | Dead (11.3)            | Biopsy      | GOJ Type 2  | 3     | T3N2M0           | Poor            |
| SH/071 | Naïve       | Alive (37.5)           | Surgery     | GOJ Type 1  | 3     | T3N2M0           | Poor            |
| ST/036 | RCTX        | Dead (4.0)             | Biopsy      | GOJ Type 3  | 3     | T3N2MX           | Poor            |
| ST/037 | CTX         | Alive (37.6)           | Biopsy      | GOJ Type 1  | 2     | T3N0M0           | Moderate        |
| ED/041 | Naïve       | Alive (37.7)           | Surgery     | GOJ Type 3  | 2     | T3N0M0           | Moderate        |
| AH/169 | Naïve       | Alive (30.6)           | Surgery     | GOJ Type 2  | 1     | T1aN0M0          | Moderate        |
| WG008  | Naïve       | Alive (48.5)           | Surgery     | GOJ Type 3  | 2     | T3N0M0           | Moderate        |
| RS/010 | Naïve       | Alive (35.2)           | Biopsy      | GOJ Type 1  | 1     | T1bN0M0          | Moderate        |
| AH/135 | Naïve       | Alive (35.1)           | Surgery     | GOJ Type 2  | 1     | T1bN0M0          | Moderate        |
| RS/013 | Naïve       | Alive (36.9)           | Biopsy      | GOJ Type 3  | 3     | T3N3MX           | Poor            |
| AH/155 | CTX         | Alive (34.1)           | Biopsy      | GOJ Type 1  | 1     | T2N0M0           | Poor            |
| RS/029 | CTX         | Alive (31.9)           | Biopsy      | GOJ Type 1  | 1     | T2N0M0           | Poor            |
| AH/131 | RCTX        | Dead (19.5)            | Biopsy      | GOJ Type 2  | 1     | T2N0M0           | Moderate        |

**Table S2. Number of patients recruited at each participating UK hospital centre.** CAM=Cambridge University Hospitals NHS Foundation Trust, Cambridge; NOT=Nottingham University Hospitals NHS Trust, Nottingham; NEW=Newcastle Upon Tyne Hospital, Newcastle; UCL=University College Hospital London, London; PHH=Hinchingsbrooke Hospital, Huntingdon; ED=Edinburgh Royal Infirmary, Edinburgh; RS=Royal Surrey County Hospital National Health Service (NHS) Foundation Trust, Guildford; SH=University of Southampton & University Hospital Southampton NHS Foundation Trust, Southampton; ST=St. Thomas' Hospital, London; and WG=Wigan and Leigh NHS Foundation Trust, Manchester.

| <b>Patient group</b> | <b>Centre (n)</b> |
|----------------------|-------------------|
| Control (n=20)       | CAM (15)          |
|                      | NOT (5)           |
| Barrett's (n=24)     | CAM (16)          |
|                      | NEW (2)           |
|                      | NOT (2)           |
|                      | PHH (1)           |
|                      | UCL (3)           |
| Dysplasia (n=23)     | CAM (14)          |
|                      | NEW (1)           |
|                      | NOT (2)           |
|                      | UCL (6)           |
| Cancer (n=19)        | CAM (7)           |
|                      | ED (1)            |
|                      | RS (5)            |
|                      | SH (1)            |
|                      | ST (4)            |
|                      | WG (1)            |

**Table S3. Sample accession numbers for 16S rRNA gene amplicon sequencing data deposited in the European Nucleotide Archive.**

| Sample accession | Patient ID        | Sample type | Patient diagnosis | Sample diagnosis | Replicate |
|------------------|-------------------|-------------|-------------------|------------------|-----------|
| ERS418605        | BEST2/CAM/0002/R1 | Throat swab | Barrett's         | -                | A         |
| ERS418653        | BEST2/CAM/0002/R1 | Throat swab | Barrett's         | -                | B         |
| ERS418684        | BEST2/CAM/0002/R1 | Cytosponge  | Barrett's         | -                | A         |
| ERS418732        | BEST2/CAM/0002/R1 | Cytosponge  | Barrett's         | -                | B         |
| ERS473478        | BEST2/CAM/0002/R1 | Brush       | Barrett's         | Squamous         | A         |
| ERS473526        | BEST2/CAM/0002/R1 | Brush       | Barrett's         | Squamous         | B         |
| ERS473756        | BEST2/CAM/0002/R1 | Tissue      | Barrett's         | Squamous         | A         |
| ERS473757        | BEST2/CAM/0002/R1 | Tissue      | Barrett's         | Barrett's        | A         |
| ERS473804        | BEST2/CAM/0002/R1 | Tissue      | Barrett's         | Squamous         | B         |
| ERS473805        | BEST2/CAM/0002/R1 | Tissue      | Barrett's         | Barrett's        | B         |
| ERS418682        | BEST2/CAM/0042/R1 | Cytosponge  | Barrett's         | -                | A         |
| ERS418730        | BEST2/CAM/0042/R1 | Cytosponge  | Barrett's         | -                | B         |
| ERS473548        | BEST2/CAM/0042/R1 | Brush       | Barrett's         | Squamous         | A         |
| ERS473596        | BEST2/CAM/0042/R1 | Brush       | Barrett's         | Squamous         | B         |
| ERS473664        | BEST2/CAM/0042/R1 | Tissue      | Barrett's         | Squamous         | -         |
| ERS473665        | BEST2/CAM/0042/R1 | Tissue      | Barrett's         | Barrett's        | -         |
| ERS418711        | BEST2/CAM/0072/R1 | Cytosponge  | Dysplasia         | -                | A         |
| ERS418759        | BEST2/CAM/0072/R1 | Cytosponge  | Dysplasia         | -                | B         |
| ERS418700        | BEST2/CAM/0096/R1 | Cytosponge  | Barrett's         | -                | A         |
| ERS418748        | BEST2/CAM/0096/R1 | Cytosponge  | Barrett's         | -                | B         |
| ERS473543        | BEST2/CAM/0096/R1 | Brush       | Barrett's         | Squamous         | A         |
| ERS473591        | BEST2/CAM/0096/R1 | Brush       | Barrett's         | Squamous         | B         |
| ERS473656        | BEST2/CAM/0096/R1 | Tissue      | Barrett's         | Squamous         | -         |
| ERS473657        | BEST2/CAM/0096/R1 | Tissue      | Barrett's         | Barrett's        | -         |
| ERS418695        | BEST2/CAM/0127    | Cytosponge  | Dysplasia         | -                | A         |
| ERS418743        | BEST2/CAM/0127    | Cytosponge  | Dysplasia         | -                | B         |
| ERS418693        | BEST2/CAM/0143    | Cytosponge  | Control           | -                | A         |
| ERS418741        | BEST2/CAM/0143    | Cytosponge  | Control           | -                | B         |
| ERS473484        | BEST2/CAM/0143    | Brush       | Control           | -                | A         |
| ERS473532        | BEST2/CAM/0143    | Brush       | Control           | -                | B         |
| ERS473655        | BEST2/CAM/0143    | Tissue      | Control           | -                | -         |
| ERS418696        | BEST2/CAM/0153    | Cytosponge  | Control           | -                | A         |
| ERS418744        | BEST2/CAM/0153    | Cytosponge  | Control           | -                | B         |
| ERS473489        | BEST2/CAM/0153    | Brush       | Control           | -                | A         |
| ERS473537        | BEST2/CAM/0153    | Brush       | Control           | -                | B         |
| ERS473658        | BEST2/CAM/0153    | Tissue      | Control           | -                | -         |
| ERS418699        | BEST2/CAM/0161    | Cytosponge  | Control           | -                | A         |
| ERS418747        | BEST2/CAM/0161    | Cytosponge  | Control           | -                | B         |
| ERS473542        | BEST2/CAM/0161    | Brush       | Control           | -                | A         |
| ERS473590        | BEST2/CAM/0161    | Brush       | Control           | -                | B         |
| ERS473661        | BEST2/CAM/0161    | Tissue      | Control           | -                | -         |
| ERS418714        | BEST2/CAM/0162    | Cytosponge  | Dysplasia         | -                | A         |
| ERS418762        | BEST2/CAM/0162    | Cytosponge  | Dysplasia         | -                | B         |

|           |                   |             |           |           |   |
|-----------|-------------------|-------------|-----------|-----------|---|
| ERS418702 | BEST2/CAM/0174    | Cytosponge  | Control   | -         | A |
| ERS418750 | BEST2/CAM/0174    | Cytosponge  | Control   | -         | B |
| ERS473547 | BEST2/CAM/0174    | Brush       | Control   | -         | A |
| ERS473595 | BEST2/CAM/0174    | Brush       | Control   | -         | B |
| ERS473666 | BEST2/CAM/0174    | Tissue      | Control   | -         | - |
| ERS418704 | BEST2/CAM/0197    | Cytosponge  | Control   | -         | A |
| ERS418752 | BEST2/CAM/0197    | Cytosponge  | Control   | -         | B |
| ERS473552 | BEST2/CAM/0197    | Brush       | Control   | -         | - |
| ERS473669 | BEST2/CAM/0197    | Tissue      | Control   | -         | A |
| ERS473717 | BEST2/CAM/0197    | Tissue      | Control   | -         | B |
| ERS418707 | BEST2/CAM/0202    | Cytosponge  | Control   | -         | A |
| ERS418755 | BEST2/CAM/0202    | Cytosponge  | Control   | -         | B |
| ERS473557 | BEST2/CAM/0202    | Brush       | Control   | -         | - |
| ERS473672 | BEST2/CAM/0202    | Tissue      | Control   | -         | A |
| ERS473720 | BEST2/CAM/0202    | Tissue      | Control   | -         | B |
| ERS418710 | BEST2/CAM/0208    | Cytosponge  | Control   | -         | A |
| ERS418758 | BEST2/CAM/0208    | Cytosponge  | Control   | -         | B |
| ERS473562 | BEST2/CAM/0208    | Brush       | Control   | -         | - |
| ERS473677 | BEST2/CAM/0208    | Tissue      | Control   | -         | A |
| ERS473725 | BEST2/CAM/0208    | Tissue      | Control   | -         | B |
| ERS418712 | BEST2/CAM/0216    | Cytosponge  | Control   | -         | A |
| ERS418760 | BEST2/CAM/0216    | Cytosponge  | Control   | -         | B |
| ERS473565 | BEST2/CAM/0216    | Brush       | Control   | -         | A |
| ERS473613 | BEST2/CAM/0216    | Brush       | Control   | -         | B |
| ERS473680 | BEST2/CAM/0216    | Tissue      | Control   | -         | A |
| ERS473728 | BEST2/CAM/0216    | Tissue      | Control   | -         | B |
| ERS418621 | BEST2/CAM/0231    | Cytosponge  | Dysplasia | -         | A |
| ERS418669 | BEST2/CAM/0231    | Cytosponge  | Dysplasia | -         | B |
| ERS418604 | BEST2/CAM/0232/R1 | Throat swab | Control   | -         | A |
| ERS418627 | BEST2/CAM/0232/R1 | Cytosponge  | Control   | -         | A |
| ERS418652 | BEST2/CAM/0232/R1 | Throat swab | Control   | -         | B |
| ERS418675 | BEST2/CAM/0232/R1 | Cytosponge  | Control   | -         | B |
| ERS418694 | BEST2/CAM/0248    | Cytosponge  | Barrett's | -         | A |
| ERS418742 | BEST2/CAM/0248    | Cytosponge  | Barrett's | -         | B |
| ERS473485 | BEST2/CAM/0248    | Brush       | Barrett's | Squamous  | A |
| ERS473533 | BEST2/CAM/0248    | Brush       | Barrett's | Squamous  | B |
| ERS473659 | BEST2/CAM/0248    | Tissue      | Barrett's | Squamous  | - |
| ERS473660 | BEST2/CAM/0248    | Tissue      | Barrett's | Barrett's | - |
| ERS418697 | BEST2/CAM/0249    | Cytosponge  | Barrett's | -         | A |
| ERS418745 | BEST2/CAM/0249    | Cytosponge  | Barrett's | -         | B |
| ERS473490 | BEST2/CAM/0249    | Brush       | Barrett's | Squamous  | A |
| ERS473538 | BEST2/CAM/0249    | Brush       | Barrett's | Squamous  | B |
| ERS473662 | BEST2/CAM/0249    | Tissue      | Barrett's | Squamous  | - |
| ERS473663 | BEST2/CAM/0249    | Tissue      | Barrett's | Barrett's | - |
| ERS418706 | BEST2/CAM/0287    | Cytosponge  | Dysplasia | -         | A |
| ERS418754 | BEST2/CAM/0287    | Cytosponge  | Dysplasia | -         | B |

|           |                   |             |           |           |   |
|-----------|-------------------|-------------|-----------|-----------|---|
| ERS418681 | BEST2/CAM/0416/R1 | Cytosponge  | Dysplasia | -         | A |
| ERS418729 | BEST2/CAM/0416/R1 | Cytosponge  | Dysplasia | -         | B |
| ERS418584 | BEST2/CAM/0424    | Throat swab | Control   | -         | A |
| ERS418613 | BEST2/CAM/0424    | Cytosponge  | Control   | -         | A |
| ERS418632 | BEST2/CAM/0424    | Throat swab | Control   | -         | B |
| ERS418661 | BEST2/CAM/0424    | Cytosponge  | Control   | -         | B |
| ERS473452 | BEST2/CAM/0424    | Brush       | Control   | -         | A |
| ERS473500 | BEST2/CAM/0424    | Brush       | Control   | -         | B |
| ERS473750 | BEST2/CAM/0424    | Tissue      | Control   | -         | A |
| ERS473798 | BEST2/CAM/0424    | Tissue      | Control   | -         | B |
| ERS418587 | BEST2/CAM/0425    | Throat swab | Control   | -         | A |
| ERS418616 | BEST2/CAM/0425    | Cytosponge  | Control   | -         | A |
| ERS418635 | BEST2/CAM/0425    | Throat swab | Control   | -         | B |
| ERS418664 | BEST2/CAM/0425    | Cytosponge  | Control   | -         | B |
| ERS473462 | BEST2/CAM/0425    | Brush       | Control   | -         | A |
| ERS473510 | BEST2/CAM/0425    | Brush       | Control   | -         | B |
| ERS473753 | BEST2/CAM/0425    | Tissue      | Control   | -         | A |
| ERS473801 | BEST2/CAM/0425    | Tissue      | Control   | -         | B |
| ERS418585 | BEST2/CAM/0427    | Throat swab | Barrett's | -         | A |
| ERS418614 | BEST2/CAM/0427    | Cytosponge  | Barrett's | -         | A |
| ERS418633 | BEST2/CAM/0427    | Throat swab | Barrett's | -         | B |
| ERS418662 | BEST2/CAM/0427    | Cytosponge  | Barrett's | -         | B |
| ERS473453 | BEST2/CAM/0427    | Brush       | Barrett's | Squamous  | A |
| ERS473501 | BEST2/CAM/0427    | Brush       | Barrett's | Squamous  | B |
| ERS473686 | BEST2/CAM/0427    | Tissue      | Barrett's | Squamous  | A |
| ERS473687 | BEST2/CAM/0427    | Tissue      | Barrett's | Barrett's | A |
| ERS473734 | BEST2/CAM/0427    | Tissue      | Barrett's | Squamous  | B |
| ERS473735 | BEST2/CAM/0427    | Tissue      | Barrett's | Barrett's | B |
| ERS418607 | BEST2/CAM/0429    | Throat swab | Barrett's | -         | A |
| ERS418655 | BEST2/CAM/0429    | Throat swab | Barrett's | -         | B |
| ERS418686 | BEST2/CAM/0429    | Cytosponge  | Barrett's | -         | A |
| ERS418734 | BEST2/CAM/0429    | Cytosponge  | Barrett's | -         | B |
| ERS473479 | BEST2/CAM/0429    | Brush       | Barrett's | Squamous  | A |
| ERS473527 | BEST2/CAM/0429    | Brush       | Barrett's | Squamous  | B |
| ERS473759 | BEST2/CAM/0429    | Tissue      | Barrett's | Squamous  | A |
| ERS473760 | BEST2/CAM/0429    | Tissue      | Barrett's | Barrett's | A |
| ERS473807 | BEST2/CAM/0429    | Tissue      | Barrett's | Squamous  | B |
| ERS473808 | BEST2/CAM/0429    | Tissue      | Barrett's | Barrett's | B |
| ERS418615 | BEST2/CAM/0430    | Cytosponge  | Dysplasia | -         | A |
| ERS418663 | BEST2/CAM/0430    | Cytosponge  | Dysplasia | -         | B |
| ERS418588 | BEST2/CAM/0437    | Throat swab | Barrett's | -         | A |
| ERS418617 | BEST2/CAM/0437    | Cytosponge  | Barrett's | -         | A |
| ERS418636 | BEST2/CAM/0437    | Throat swab | Barrett's | -         | B |
| ERS418665 | BEST2/CAM/0437    | Cytosponge  | Barrett's | -         | B |
| ERS473458 | BEST2/CAM/0437    | Brush       | Barrett's | Squamous  | A |
| ERS473506 | BEST2/CAM/0437    | Brush       | Barrett's | Squamous  | B |



|           |                |             |           |           |   |
|-----------|----------------|-------------|-----------|-----------|---|
| ERS473689 | BEST2/CAM/0437 | Tissue      | Barrett's | Squamous  | A |
| ERS473690 | BEST2/CAM/0437 | Tissue      | Barrett's | Barrett's | A |
| ERS473737 | BEST2/CAM/0437 | Tissue      | Barrett's | Squamous  | B |
| ERS473738 | BEST2/CAM/0437 | Tissue      | Barrett's | Barrett's | B |
| ERS418685 | BEST2/CAM/0444 | Cytosponge  | Dysplasia | -         | A |
| ERS418733 | BEST2/CAM/0444 | Cytosponge  | Dysplasia | -         | B |
| ERS418609 | BEST2/CAM/0445 | Throat swab | Barrett's | -         | A |
| ERS418657 | BEST2/CAM/0445 | Throat swab | Barrett's | -         | B |
| ERS418688 | BEST2/CAM/0445 | Cytosponge  | Barrett's | -         | A |
| ERS418736 | BEST2/CAM/0445 | Cytosponge  | Barrett's | -         | B |
| ERS473762 | BEST2/CAM/0445 | Tissue      | Barrett's | Squamous  | A |
| ERS473763 | BEST2/CAM/0445 | Tissue      | Barrett's | Barrett's | A |
| ERS473810 | BEST2/CAM/0445 | Tissue      | Barrett's | Squamous  | B |
| ERS473811 | BEST2/CAM/0445 | Tissue      | Barrett's | Barrett's | B |
| ERS418591 | BEST2/CAM/0446 | Throat swab | Barrett's | -         | A |
| ERS418620 | BEST2/CAM/0446 | Cytosponge  | Barrett's | -         | A |
| ERS418639 | BEST2/CAM/0446 | Throat swab | Barrett's | -         | B |
| ERS418668 | BEST2/CAM/0446 | Cytosponge  | Barrett's | -         | B |
| ERS473463 | BEST2/CAM/0446 | Brush       | Barrett's | Squamous  | A |
| ERS473511 | BEST2/CAM/0446 | Brush       | Barrett's | Squamous  | B |
| ERS473692 | BEST2/CAM/0446 | Tissue      | Barrett's | Squamous  | A |
| ERS473740 | BEST2/CAM/0446 | Tissue      | Barrett's | Squamous  | B |
| ERS473741 | BEST2/CAM/0446 | Tissue      | Barrett's | Barrett's | A |
| ERS473789 | BEST2/CAM/0446 | Tissue      | Barrett's | Barrett's | B |
| ERS418687 | BEST2/CAM/0448 | Cytosponge  | Dysplasia | -         | A |
| ERS418735 | BEST2/CAM/0448 | Cytosponge  | Dysplasia | -         | B |
| ERS418593 | BEST2/CAM/0449 | Throat swab | Barrett's | -         | A |
| ERS418623 | BEST2/CAM/0449 | Cytosponge  | Barrett's | -         | A |
| ERS418641 | BEST2/CAM/0449 | Throat swab | Barrett's | -         | B |
| ERS418671 | BEST2/CAM/0449 | Cytosponge  | Barrett's | -         | B |
| ERS473466 | BEST2/CAM/0449 | Brush       | Barrett's | Squamous  | A |
| ERS473514 | BEST2/CAM/0449 | Brush       | Barrett's | Squamous  | B |
| ERS473743 | BEST2/CAM/0449 | Tissue      | Barrett's | Squamous  | A |
| ERS473744 | BEST2/CAM/0449 | Tissue      | Barrett's | Barrett's | A |
| ERS473791 | BEST2/CAM/0449 | Tissue      | Barrett's | Squamous  | B |
| ERS473792 | BEST2/CAM/0449 | Tissue      | Barrett's | Barrett's | B |
| ERS418590 | BEST2/CAM/0451 | Throat swab | Control   | -         | A |
| ERS418638 | BEST2/CAM/0451 | Throat swab | Control   | -         | B |
| ERS418683 | BEST2/CAM/0451 | Cytosponge  | Control   | -         | A |
| ERS418731 | BEST2/CAM/0451 | Cytosponge  | Control   | -         | B |
| ERS473465 | BEST2/CAM/0451 | Brush       | Control   | -         | A |
| ERS473513 | BEST2/CAM/0451 | Brush       | Control   | -         | B |
| ERS473758 | BEST2/CAM/0451 | Tissue      | Control   | -         | A |
| ERS473806 | BEST2/CAM/0451 | Tissue      | Control   | -         | B |
| ERS418631 | BEST2/CAM/0453 | Cytosponge  | Dysplasia | -         | A |
| ERS418679 | BEST2/CAM/0453 | Cytosponge  | Dysplasia | -         | B |

|           |                |             |           |           |   |
|-----------|----------------|-------------|-----------|-----------|---|
| ERS418595 | BEST2/CAM/0454 | Throat swab | Barrett's | -         | A |
| ERS418625 | BEST2/CAM/0454 | Cytosponge  | Barrett's | -         | A |
| ERS418643 | BEST2/CAM/0454 | Throat swab | Barrett's | -         | B |
| ERS418673 | BEST2/CAM/0454 | Cytosponge  | Barrett's | -         | B |
| ERS473469 | BEST2/CAM/0454 | Brush       | Barrett's | Squamous  | A |
| ERS473517 | BEST2/CAM/0454 | Brush       | Barrett's | Squamous  | B |
| ERS473745 | BEST2/CAM/0454 | Tissue      | Barrett's | Squamous  | A |
| ERS473746 | BEST2/CAM/0454 | Tissue      | Barrett's | Barrett's | A |
| ERS473793 | BEST2/CAM/0454 | Tissue      | Barrett's | Squamous  | B |
| ERS473794 | BEST2/CAM/0454 | Tissue      | Barrett's | Barrett's | B |
| ERS418611 | BEST2/CAM/0456 | Throat swab | Barrett's | -         | A |
| ERS418659 | BEST2/CAM/0456 | Throat swab | Barrett's | -         | B |
| ERS418690 | BEST2/CAM/0456 | Cytosponge  | Barrett's | -         | A |
| ERS418738 | BEST2/CAM/0456 | Cytosponge  | Barrett's | -         | B |
| ERS473481 | BEST2/CAM/0456 | Brush       | Barrett's | Squamous  | A |
| ERS473529 | BEST2/CAM/0456 | Brush       | Barrett's | Squamous  | B |
| ERS473765 | BEST2/CAM/0456 | Tissue      | Barrett's | Squamous  | A |
| ERS473766 | BEST2/CAM/0456 | Tissue      | Barrett's | Barrett's | A |
| ERS473813 | BEST2/CAM/0456 | Tissue      | Barrett's | Squamous  | B |
| ERS473814 | BEST2/CAM/0456 | Tissue      | Barrett's | Barrett's | B |
| ERS418612 | BEST2/CAM/0458 | Throat swab | Barrett's | -         | A |
| ERS418660 | BEST2/CAM/0458 | Throat swab | Barrett's | -         | B |
| ERS418692 | BEST2/CAM/0458 | Cytosponge  | Barrett's | -         | A |
| ERS418740 | BEST2/CAM/0458 | Cytosponge  | Barrett's | -         | B |
| ERS473482 | BEST2/CAM/0458 | Brush       | Barrett's | Squamous  | A |
| ERS473530 | BEST2/CAM/0458 | Brush       | Barrett's | Squamous  | B |
| ERS473768 | BEST2/CAM/0458 | Tissue      | Barrett's | Squamous  | A |
| ERS473769 | BEST2/CAM/0458 | Tissue      | Barrett's | Barrett's | A |
| ERS473816 | BEST2/CAM/0458 | Tissue      | Barrett's | Squamous  | B |
| ERS473817 | BEST2/CAM/0458 | Tissue      | Barrett's | Barrett's | B |
| ERS418598 | BEST2/CAM/0459 | Throat swab | Barrett's | -         | A |
| ERS418628 | BEST2/CAM/0459 | Cytosponge  | Barrett's | -         | A |
| ERS418646 | BEST2/CAM/0459 | Throat swab | Barrett's | -         | B |
| ERS418676 | BEST2/CAM/0459 | Cytosponge  | Barrett's | -         | B |
| ERS473472 | BEST2/CAM/0459 | Brush       | Barrett's | Squamous  | A |
| ERS473520 | BEST2/CAM/0459 | Brush       | Barrett's | Squamous  | B |
| ERS473748 | BEST2/CAM/0459 | Tissue      | Barrett's | Squamous  | A |
| ERS473749 | BEST2/CAM/0459 | Tissue      | Barrett's | Barrett's | A |
| ERS473796 | BEST2/CAM/0459 | Tissue      | Barrett's | Squamous  | B |
| ERS473797 | BEST2/CAM/0459 | Tissue      | Barrett's | Barrett's | B |
| ERS418594 | BEST2/CAM/0460 | Throat swab | Control   | -         | A |
| ERS418622 | BEST2/CAM/0460 | Cytosponge  | Control   | -         | A |
| ERS418642 | BEST2/CAM/0460 | Throat swab | Control   | -         | B |
| ERS418670 | BEST2/CAM/0460 | Cytosponge  | Control   | -         | B |
| ERS473468 | BEST2/CAM/0460 | Brush       | Control   | -         | A |
| ERS473516 | BEST2/CAM/0460 | Brush       | Control   | -         | B |

|           |                |             |           |           |   |
|-----------|----------------|-------------|-----------|-----------|---|
| ERS473761 | BEST2/CAM/0460 | Tissue      | Control   | -         | A |
| ERS473809 | BEST2/CAM/0460 | Tissue      | Control   | -         | B |
| ERS418618 | BEST2/CAM/0462 | Cytosponge  | Dysplasia | -         | A |
| ERS418666 | BEST2/CAM/0462 | Cytosponge  | Dysplasia | -         | B |
| ERS418597 | BEST2/CAM/0464 | Throat swab | Control   | -         | A |
| ERS418619 | BEST2/CAM/0464 | Cytosponge  | Control   | -         | A |
| ERS418645 | BEST2/CAM/0464 | Throat swab | Control   | -         | B |
| ERS418667 | BEST2/CAM/0464 | Cytosponge  | Control   | -         | B |
| ERS473471 | BEST2/CAM/0464 | Brush       | Control   | -         | A |
| ERS473519 | BEST2/CAM/0464 | Brush       | Control   | -         | B |
| ERS473764 | BEST2/CAM/0464 | Tissue      | Control   | -         | A |
| ERS473812 | BEST2/CAM/0464 | Tissue      | Control   | -         | B |
| ERS418689 | BEST2/CAM/0466 | Cytosponge  | Dysplasia | -         | A |
| ERS418737 | BEST2/CAM/0466 | Cytosponge  | Dysplasia | -         | B |
| ERS418601 | BEST2/CAM/0470 | Throat swab | Barrett's | -         | A |
| ERS418630 | BEST2/CAM/0470 | Cytosponge  | Barrett's | -         | A |
| ERS418649 | BEST2/CAM/0470 | Throat swab | Barrett's | -         | B |
| ERS418678 | BEST2/CAM/0470 | Cytosponge  | Barrett's | -         | B |
| ERS473474 | BEST2/CAM/0470 | Brush       | Barrett's | Squamous  | A |
| ERS473522 | BEST2/CAM/0470 | Brush       | Barrett's | Squamous  | B |
| ERS473751 | BEST2/CAM/0470 | Tissue      | Barrett's | Squamous  | A |
| ERS473752 | BEST2/CAM/0470 | Tissue      | Barrett's | Barrett's | A |
| ERS473799 | BEST2/CAM/0470 | Tissue      | Barrett's | Squamous  | B |
| ERS473800 | BEST2/CAM/0470 | Tissue      | Barrett's | Barrett's | B |
| ERS418629 | BEST2/CAM/0472 | Cytosponge  | Dysplasia | -         | A |
| ERS418677 | BEST2/CAM/0472 | Cytosponge  | Dysplasia | -         | B |
| ERS418691 | BEST2/CAM/0475 | Cytosponge  | Dysplasia | -         | A |
| ERS418739 | BEST2/CAM/0475 | Cytosponge  | Dysplasia | -         | B |
| ERS418600 | BEST2/CAM/0487 | Throat swab | Control   | -         | A |
| ERS418624 | BEST2/CAM/0487 | Cytosponge  | Control   | -         | A |
| ERS418648 | BEST2/CAM/0487 | Throat swab | Control   | -         | B |
| ERS418672 | BEST2/CAM/0487 | Cytosponge  | Control   | -         | B |
| ERS473457 | BEST2/CAM/0487 | Brush       | Control   | -         | A |
| ERS473505 | BEST2/CAM/0487 | Brush       | Control   | -         | B |
| ERS473767 | BEST2/CAM/0487 | Tissue      | Control   | -         | A |
| ERS473815 | BEST2/CAM/0487 | Tissue      | Control   | -         | B |
| ERS473449 | BEST2/NEW/0011 | Cytosponge  | Dysplasia | -         | A |
| ERS473497 | BEST2/NEW/0011 | Cytosponge  | Dysplasia | -         | B |
| ERS418705 | BEST2/NEW/0047 | Cytosponge  | Barrett's | -         | A |
| ERS418753 | BEST2/NEW/0047 | Cytosponge  | Barrett's | -         | B |
| ERS473553 | BEST2/NEW/0047 | Brush       | Barrett's | Squamous  | - |
| ERS473667 | BEST2/NEW/0047 | Tissue      | Barrett's | Squamous  | - |
| ERS473668 | BEST2/NEW/0047 | Tissue      | Barrett's | Barrett's | - |
| ERS418708 | BEST2/NEW/0048 | Cytosponge  | Barrett's | -         | A |
| ERS418756 | BEST2/NEW/0048 | Cytosponge  | Barrett's | -         | B |
| ERS473558 | BEST2/NEW/0048 | Brush       | Barrett's | Squamous  | - |

|           |                |            |           |           |   |
|-----------|----------------|------------|-----------|-----------|---|
| ERS473670 | BEST2/NEW/0048 | Tissue     | Barrett's | Squamous  | A |
| ERS473671 | BEST2/NEW/0048 | Tissue     | Barrett's | Barrett's | A |
| ERS473718 | BEST2/NEW/0048 | Tissue     | Barrett's | Squamous  | B |
| ERS473719 | BEST2/NEW/0048 | Tissue     | Barrett's | Barrett's | B |
| ERS418715 | BEST2/NOT/0025 | Cytosponge | Control   | -         | A |
| ERS418763 | BEST2/NOT/0025 | Cytosponge | Control   | -         | B |
| ERS473570 | BEST2/NOT/0025 | Brush      | Control   | -         | A |
| ERS473618 | BEST2/NOT/0025 | Brush      | Control   | -         | B |
| ERS473683 | BEST2/NOT/0025 | Tissue     | Control   | -         | A |
| ERS473731 | BEST2/NOT/0025 | Tissue     | Control   | -         | B |
| ERS418709 | BEST2/NOT/0027 | Cytosponge | Dysplasia | -         | A |
| ERS418757 | BEST2/NOT/0027 | Cytosponge | Dysplasia | -         | B |
| ERS418780 | BEST2/NOT/0031 | Cytosponge | Control   | -         | A |
| ERS418783 | BEST2/NOT/0031 | Cytosponge | Control   | -         | B |
| ERS473637 | BEST2/NOT/0031 | Brush      | Control   | -         | A |
| ERS473640 | BEST2/NOT/0031 | Brush      | Control   | -         | B |
| ERS473688 | BEST2/NOT/0031 | Tissue     | Control   | -         | A |
| ERS473736 | BEST2/NOT/0031 | Tissue     | Control   | -         | B |
| ERS473444 | BEST2/NOT/0032 | Cytosponge | Control   | -         | A |
| ERS473492 | BEST2/NOT/0032 | Cytosponge | Control   | -         | B |
| ERS473645 | BEST2/NOT/0032 | Brush      | Control   | -         | A |
| ERS473691 | BEST2/NOT/0032 | Tissue     | Control   | -         | B |
| ERS473739 | BEST2/NOT/0032 | Tissue     | Control   | -         | - |
| ERS418701 | BEST2/NOT/0036 | Cytosponge | Dysplasia | -         | A |
| ERS418749 | BEST2/NOT/0036 | Cytosponge | Dysplasia | -         | B |
| ERS473447 | BEST2/NOT/0039 | Cytosponge | Control   | -         | A |
| ERS473495 | BEST2/NOT/0039 | Cytosponge | Control   | -         | B |
| ERS473649 | BEST2/NOT/0039 | Brush      | Control   | -         | - |
| ERS473742 | BEST2/NOT/0039 | Tissue     | Control   | -         | A |
| ERS473790 | BEST2/NOT/0039 | Tissue     | Control   | -         | B |
| ERS418713 | BEST2/NOT/0040 | Cytosponge | Barrett's | -         | A |
| ERS418761 | BEST2/NOT/0040 | Cytosponge | Barrett's | -         | B |
| ERS473566 | BEST2/NOT/0040 | Brush      | Barrett's | Squamous  | A |
| ERS473614 | BEST2/NOT/0040 | Brush      | Barrett's | Squamous  | B |
| ERS473673 | BEST2/NOT/0040 | Tissue     | Barrett's | Squamous  | A |
| ERS473674 | BEST2/NOT/0040 | Tissue     | Barrett's | Barrett's | A |
| ERS473721 | BEST2/NOT/0040 | Tissue     | Barrett's | Squamous  | B |
| ERS473722 | BEST2/NOT/0040 | Tissue     | Barrett's | Barrett's | B |
| ERS418778 | BEST2/NOT/0046 | Cytosponge | Barrett's | -         | A |
| ERS418781 | BEST2/NOT/0046 | Cytosponge | Barrett's | -         | B |
| ERS473571 | BEST2/NOT/0046 | Brush      | Barrett's | Squamous  | A |
| ERS473619 | BEST2/NOT/0046 | Brush      | Barrett's | Squamous  | B |
| ERS473675 | BEST2/NOT/0046 | Tissue     | Barrett's | Squamous  | A |
| ERS473676 | BEST2/NOT/0046 | Tissue     | Barrett's | Barrett's | A |
| ERS473723 | BEST2/NOT/0046 | Tissue     | Barrett's | Squamous  | B |
| ERS473724 | BEST2/NOT/0046 | Tissue     | Barrett's | Barrett's | B |

|           |                   |             |           |           |   |
|-----------|-------------------|-------------|-----------|-----------|---|
| ERS473450 | BEST2/NOT/0054    | Cytosponge  | Control   | -         | A |
| ERS473498 | BEST2/NOT/0054    | Cytosponge  | Control   | -         | B |
| ERS473652 | BEST2/NOT/0054    | Brush       | Control   | -         | - |
| ERS473747 | BEST2/NOT/0054    | Tissue      | Control   | -         | A |
| ERS473795 | BEST2/NOT/0054    | Tissue      | Control   | -         | B |
| ERS418603 | BEST2/PHH/0009    | Throat swab | Barrett's | -         | A |
| ERS418651 | BEST2/PHH/0009    | Throat swab | Barrett's | -         | B |
| ERS418680 | BEST2/PHH/0009    | Cytosponge  | Barrett's | -         | A |
| ERS418728 | BEST2/PHH/0009    | Cytosponge  | Barrett's | -         | B |
| ERS473476 | BEST2/PHH/0009    | Brush       | Barrett's | Squamous  | A |
| ERS473524 | BEST2/PHH/0009    | Brush       | Barrett's | Squamous  | B |
| ERS473754 | BEST2/PHH/0009    | Tissue      | Barrett's | Squamous  | A |
| ERS473755 | BEST2/PHH/0009    | Tissue      | Barrett's | Barrett's | A |
| ERS473802 | BEST2/PHH/0009    | Tissue      | Barrett's | Squamous  | B |
| ERS473803 | BEST2/PHH/0009    | Tissue      | Barrett's | Barrett's | B |
| ERS418703 | BEST2/UCL/0003/R1 | Cytosponge  | Dysplasia | -         | A |
| ERS418751 | BEST2/UCL/0003/R1 | Cytosponge  | Dysplasia | -         | B |
| ERS473446 | BEST2/UCL/0028/R1 | Cytosponge  | Dysplasia | -         | A |
| ERS473494 | BEST2/UCL/0028/R1 | Cytosponge  | Dysplasia | -         | B |
| ERS418626 | BEST2/UCL/0034/R1 | Cytosponge  | Dysplasia | -         | A |
| ERS418674 | BEST2/UCL/0034/R1 | Cytosponge  | Dysplasia | -         | B |
| ERS473445 | BEST2/UCL/0038/R1 | Cytosponge  | Barrett's | -         | A |
| ERS473493 | BEST2/UCL/0038/R1 | Cytosponge  | Barrett's | -         | B |
| ERS473646 | BEST2/UCL/0038/R1 | Brush       | Barrett's | Squamous  | - |
| ERS473678 | BEST2/UCL/0038/R1 | Tissue      | Barrett's | Squamous  | A |
| ERS473679 | BEST2/UCL/0038/R1 | Tissue      | Barrett's | Barrett's | A |
| ERS473726 | BEST2/UCL/0038/R1 | Tissue      | Barrett's | Squamous  | B |
| ERS473727 | BEST2/UCL/0038/R1 | Tissue      | Barrett's | Barrett's | B |
| ERS418779 | BEST2/UCL/0041/R1 | Cytosponge  | Dysplasia | -         | A |
| ERS418782 | BEST2/UCL/0041/R1 | Cytosponge  | Dysplasia | -         | B |
| ERS473443 | BEST2/UCL/0047    | Cytosponge  | Dysplasia | -         | A |
| ERS473491 | BEST2/UCL/0047    | Cytosponge  | Dysplasia | -         | B |
| ERS418698 | BEST2/UCL/0049    | Cytosponge  | Dysplasia | -         | A |
| ERS418746 | BEST2/UCL/0049    | Cytosponge  | Dysplasia | -         | B |
| ERS473448 | BEST2/UCL/0055    | Cytosponge  | Barrett's | -         | A |
| ERS473496 | BEST2/UCL/0055    | Cytosponge  | Barrett's | -         | B |
| ERS473650 | BEST2/UCL/0055    | Brush       | Barrett's | Squamous  | - |
| ERS473681 | BEST2/UCL/0055    | Tissue      | Barrett's | Squamous  | A |
| ERS473682 | BEST2/UCL/0055    | Tissue      | Barrett's | Barrett's | A |
| ERS473729 | BEST2/UCL/0055    | Tissue      | Barrett's | Squamous  | B |
| ERS473730 | BEST2/UCL/0055    | Tissue      | Barrett's | Barrett's | B |
| ERS473451 | BEST2/UCL/0058    | Cytosponge  | Barrett's | -         | A |
| ERS473499 | BEST2/UCL/0058    | Cytosponge  | Barrett's | -         | B |
| ERS473653 | BEST2/UCL/0058    | Brush       | Barrett's | Squamous  | - |
| ERS473684 | BEST2/UCL/0058    | Tissue      | Barrett's | Squamous  | A |
| ERS473685 | BEST2/UCL/0058    | Tissue      | Barrett's | Barrett's | A |

|           |                |        |           |           |   |
|-----------|----------------|--------|-----------|-----------|---|
| ERS473732 | BEST2/UCL/0058 | Tissue | Barrett's | Squamous  | B |
| ERS473733 | BEST2/UCL/0058 | Tissue | Barrett's | Barrett's | B |
| ERS473774 | OCCAMS/AH/085  | Tissue | Cancer    | Squamous  | A |
| ERS473775 | OCCAMS/AH/085  | Tissue | Cancer    | Tumour    | A |
| ERS473826 | OCCAMS/AH/085  | Tissue | Cancer    | Squamous  | B |
| ERS473827 | OCCAMS/AH/085  | Tissue | Cancer    | Tumour    | B |
| ERS473628 | OCCAMS/AH/131  | Tissue | Cancer    | Tumour    | A |
| ERS473634 | OCCAMS/AH/131  | Tissue | Cancer    | Tumour    | B |
| ERS473605 | OCCAMS/AH/135  | Tissue | Cancer    | Squamous  | B |
| ERS473606 | OCCAMS/AH/135  | Tissue | Cancer    | Tumour    | B |
| ERS473783 | OCCAMS/AH/135  | Tissue | Cancer    | Squamous  | A |
| ERS473784 | OCCAMS/AH/135  | Tissue | Cancer    | Tumour    | A |
| ERS473623 | OCCAMS/AH/155  | Tissue | Cancer    | Squamous  | A |
| ERS473624 | OCCAMS/AH/155  | Tissue | Cancer    | Tumour    | A |
| ERS473629 | OCCAMS/AH/155  | Tissue | Cancer    | Squamous  | B |
| ERS473630 | OCCAMS/AH/155  | Tissue | Cancer    | Tumour    | B |
| ERS473599 | OCCAMS/AH/169  | Tissue | Cancer    | Squamous  | B |
| ERS473600 | OCCAMS/AH/169  | Tissue | Cancer    | Tumour    | B |
| ERS473777 | OCCAMS/AH/169  | Tissue | Cancer    | Squamous  | A |
| ERS473778 | OCCAMS/AH/169  | Tissue | Cancer    | Tumour    | A |
| ERS473703 | OCCAMS/ED/41   | Tissue | Cancer    | Squamous  | A |
| ERS473704 | OCCAMS/ED/41   | Tissue | Cancer    | Tumour    | A |
| ERS473715 | OCCAMS/ED/41   | Tissue | Cancer    | Squamous  | B |
| ERS473716 | OCCAMS/ED/41   | Tissue | Cancer    | Tumour    | B |
| ERS473770 | OCCAMS/PS/002  | Tissue | Cancer    | Squamous  | A |
| ERS473771 | OCCAMS/PS/002  | Tissue | Cancer    | Tumour    | A |
| ERS473822 | OCCAMS/PS/002  | Tissue | Cancer    | Squamous  | B |
| ERS473823 | OCCAMS/PS/002  | Tissue | Cancer    | Tumour    | B |
| ERS473772 | OCCAMS/PS/003  | Tissue | Cancer    | Squamous  | A |
| ERS473773 | OCCAMS/PS/003  | Tissue | Cancer    | Tumour    | A |
| ERS473824 | OCCAMS/PS/003  | Tissue | Cancer    | Squamous  | B |
| ERS473825 | OCCAMS/PS/003  | Tissue | Cancer    | Tumour    | B |
| ERS473695 | OCCAMS/RS/006  | Tissue | Cancer    | Squamous  | A |
| ERS473696 | OCCAMS/RS/006  | Tissue | Cancer    | Tumour    | A |
| ERS473707 | OCCAMS/RS/006  | Tissue | Cancer    | Squamous  | B |
| ERS473708 | OCCAMS/RS/006  | Tissue | Cancer    | Tumour    | B |
| ERS473693 | OCCAMS/RS/007  | Tissue | Cancer    | Squamous  | A |
| ERS473694 | OCCAMS/RS/007  | Tissue | Cancer    | Tumour    | A |
| ERS473705 | OCCAMS/RS/007  | Tissue | Cancer    | Squamous  | B |
| ERS473706 | OCCAMS/RS/007  | Tissue | Cancer    | Tumour    | B |
| ERS473603 | OCCAMS/RS/010  | Tissue | Cancer    | Squamous  | B |
| ERS473604 | OCCAMS/RS/010  | Tissue | Cancer    | Tumour    | B |
| ERS473781 | OCCAMS/RS/010  | Tissue | Cancer    | Squamous  | A |
| ERS473782 | OCCAMS/RS/010  | Tissue | Cancer    | Tumour    | A |
| ERS473607 | OCCAMS/RS/013  | Tissue | Cancer    | Squamous  | B |
| ERS473608 | OCCAMS/RS/013  | Tissue | Cancer    | Tumour    | B |

|           |                          |          |        |          |   |
|-----------|--------------------------|----------|--------|----------|---|
| ERS473785 | OCCAMS/RS/013            | Tissue   | Cancer | Squamous | A |
| ERS473786 | OCCAMS/RS/013            | Tissue   | Cancer | Tumour   | A |
| ERS473625 | OCCAMS/RS/029            | Tissue   | Cancer | Squamous | A |
| ERS473626 | OCCAMS/RS/029            | Tissue   | Cancer | Tumour   | A |
| ERS473631 | OCCAMS/RS/029            | Tissue   | Cancer | Squamous | B |
| ERS473632 | OCCAMS/RS/029            | Tissue   | Cancer | Tumour   | B |
| ERS473697 | OCCAMS/SH/071            | Tissue   | Cancer | Squamous | A |
| ERS473698 | OCCAMS/SH/071            | Tissue   | Cancer | Tumour   | A |
| ERS473709 | OCCAMS/SH/071            | Tissue   | Cancer | Squamous | B |
| ERS473710 | OCCAMS/SH/071            | Tissue   | Cancer | Tumour   | B |
| ERS473844 | OCCAMS/ST/030            | Tissue   | Cancer | Squamous | A |
| ERS473845 | OCCAMS/ST/030            | Tissue   | Cancer | Tumour   | A |
| ERS473847 | OCCAMS/ST/030            | Tissue   | Cancer | Squamous | B |
| ERS473848 | OCCAMS/ST/030            | Tissue   | Cancer | Tumour   | B |
| ERS473699 | OCCAMS/ST/036            | Tissue   | Cancer | Squamous | A |
| ERS473700 | OCCAMS/ST/036            | Tissue   | Cancer | Tumour   | A |
| ERS473711 | OCCAMS/ST/036            | Tissue   | Cancer | Squamous | B |
| ERS473712 | OCCAMS/ST/036            | Tissue   | Cancer | Tumour   | B |
| ERS473701 | OCCAMS/ST/037            | Tissue   | Cancer | Squamous | A |
| ERS473702 | OCCAMS/ST/037            | Tissue   | Cancer | Tumour   | A |
| ERS473713 | OCCAMS/ST/037            | Tissue   | Cancer | Squamous | B |
| ERS473714 | OCCAMS/ST/037            | Tissue   | Cancer | Tumour   | B |
| ERS473776 | OCCAMS/ST/041            | Tissue   | Cancer | Squamous | A |
| ERS473828 | OCCAMS/ST/041            | Tissue   | Cancer | Squamous | B |
| ERS473843 | OCCAMS/ST/041            | Tissue   | Cancer | Tumour   | A |
| ERS473846 | OCCAMS/ST/041            | Tissue   | Cancer | Tumour   | B |
| ERS473601 | OCCAMS/WG/008            | Tissue   | Cancer | Squamous | B |
| ERS473602 | OCCAMS/WG/008            | Tissue   | Cancer | Tumour   | B |
| ERS473779 | OCCAMS/WG/008            | Tissue   | Cancer | Squamous | A |
| ERS473780 | OCCAMS/WG/008            | Tissue   | Cancer | Tumour   | A |
| ERS473579 | Neg_control_Brush10      | Reagents | -      | -        | - |
| ERS473580 | Neg_control_Brush2       | Reagents | -      | -        | - |
| ERS473581 | Neg_control_Brush3       | Reagents | -      | -        | - |
| ERS473582 | Neg_control_Brush4       | Reagents | -      | -        | - |
| ERS473583 | Neg_control_Brush5       | Reagents | -      | -        | - |
| ERS473584 | Neg_control_Brush6       | Reagents | -      | -        | - |
| ERS473829 | Neg_control_Brush7       | Reagents | -      | -        | - |
| ERS473577 | Neg_control_Brush8       | Reagents | -      | -        | - |
| ERS473578 | Neg_control_Brush9       | Reagents | -      | -        | - |
| ERS418722 | Neg_control_Cytosponge2  | Reagents | -      | -        | A |
| ERS418770 | Neg_control_Cytosponge2  | Reagents | -      | -        | B |
| ERS418719 | Neg_control_Cytosponge21 | Reagents | -      | -        | A |
| ERS418767 | Neg_control_Cytosponge21 | Reagents | -      | -        | B |
| ERS418720 | Neg_control_Cytosponge22 | Reagents | -      | -        | A |
| ERS418768 | Neg_control_Cytosponge22 | Reagents | -      | -        | B |
| ERS418721 | Neg_control_Cytosponge23 | Reagents | -      | -        | A |

|           |                           |          |   |   |
|-----------|---------------------------|----------|---|---|
| ERS418769 | Neg_control_Cytosponge23  | Reagents | - | B |
| ERS418723 | Neg_control_Cytosponge3   | Reagents | - | A |
| ERS418771 | Neg_control_Cytosponge3   | Reagents | - | B |
| ERS418724 | Neg_control_Cytosponge4   | Reagents | - | A |
| ERS418772 | Neg_control_Cytosponge4   | Reagents | - | B |
| ERS418725 | Neg_control_Cytosponge5   | Reagents | - | A |
| ERS418773 | Neg_control_Cytosponge5   | Reagents | - | B |
| ERS418726 | Neg_control_Cytosponge6   | Reagents | - | A |
| ERS418774 | Neg_control_Cytosponge6   | Reagents | - | B |
| ERS473575 | Neg_control_Cytosponge7   | Reagents | - | - |
| ERS473576 | Neg_control_Cytosponge8   | Reagents | - | - |
| ERS418716 | Neg_control_Throat_swab11 | Reagents | - | A |
| ERS418764 | Neg_control_Throat_swab11 | Reagents | - | B |
| ERS418717 | Neg_control_Throat_swab12 | Reagents | - | A |
| ERS418765 | Neg_control_Throat_swab12 | Reagents | - | B |
| ERS418718 | Neg_control_Throat_swab13 | Reagents | - | A |
| ERS418766 | Neg_control_Throat_swab13 | Reagents | - | B |
| ERS473830 | Neg_control_Tissue14      | Reagents | - | - |
| ERS473831 | Neg_control_Tissue15      | Reagents | - | - |
| ERS473832 | Neg_control_Tissue16      | Reagents | - | - |
| ERS473833 | Neg_control_Tissue17      | Reagents | - | - |
| ERS473834 | Neg_control_Tissue18      | Reagents | - | - |
| ERS473835 | Neg_control_Tissue19      | Reagents | - | - |
| ERS473836 | Neg_control_Tissue20      | Reagents | - | - |
| ERS473837 | Neg_control_Tissue24      | Reagents | - | - |
| ERS473609 | Neg_control_Tissue25      | Reagents | - | A |
| ERS473787 | Neg_control_Tissue25      | Reagents | - | B |
| ERS473610 | Neg_control_Tissue26      | Reagents | - | A |
| ERS473788 | Neg_control_Tissue26      | Reagents | - | B |
| ERS418727 | PCR_water_blank1          | Water    | - | A |
| ERS418775 | PCR_water_blank1          | Water    | - | B |
| ERS418776 | PCR_water_blank2          | Water    | - | A |
| ERS418777 | PCR_water_blank2          | Water    | - | B |
| ERS473585 | PCR_water_blank3          | Water    | - | A |
| ERS473586 | PCR_water_blank3          | Water    | - | B |
| ERS473635 | PCR_water_blank4          | Water    | - | - |
| ERS473636 | PCR_water_blank5          | Water    | - | - |
| ERS473838 | PCR_water_blank6          | Water    | - | A |
| ERS473839 | PCR_water_blank6          | Water    | - | B |
| ERS473840 | PCR_water_blank6          | Water    | - | C |
| ERS473841 | PCR_water_blank7          | Water    | - | - |
| ERS473842 | PCR_water_blank8          | Water    | - | - |
